# Supplementary material for: Solubilisation of a 2,2-diphenyl-1-picrylhydrazyl radical in water by β-cyclodextrin to evaluate the radical-scavenging activity of antioxidants in aqueous media
Source: Royal Society of Chemistry journal article supplement (doi:10.1039/c5cc02236c), 2015-01-01
Supplement: c5cc02236c1.pdf [file c5cc02236c1.pdf]

## Electronic Supplementary Information (ESI)

### Solubilisation of a 2,2-diphenyl-1-picrylhydrazyl radical in water by $\beta$ -cyclodextrin to evaluate the radical-scavenging activity of antioxidants in aqueous media

**Ikuro Nakanishi,\*<sup>a</sup> Kei Ohkubo,<sup>bc</sup> Kohei Imai,<sup>d</sup> Masato Kamibayashi,<sup>e</sup>  
Yasuo Yoshihashi,<sup>f</sup> Ken-ichiro Matsumoto,<sup>a</sup> Kiyoshi Fukuhara,<sup>d</sup>  
Katsuhide Terada,<sup>f</sup> Shinobu Itoh,<sup>b</sup> Toshihiko Ozawa<sup>g</sup> and Shunichi Fukuzumi\*<sup>bchi</sup>**

<sup>a</sup> *Research Center for Charged Particle Therapy, National Institute of Radiological Sciences (NIRS), Inage-ku, Chiba 263-8555, Japan.*

<sup>b</sup> *Department of Material and Life Science, Graduate School of Engineering, Osaka University, Suita, Osaka 565-0871, Japan.*

<sup>c</sup> *ALCA and SENTAN, Japan Science and Technology Agency (JST), Suita, Osaka 565-0871, Japan.*

<sup>d</sup> *School of Pharmacy, Showa University, Shinagawa-ku, Tokyo 142-8555, Japan.*

<sup>e</sup> *Pharmaceutical Manufacturing Chemistry, Kyoto Pharmaceutical University, Kyoto 607-8414, Japan.*

<sup>f</sup> *Department of Pharmaceutics, Faculty of Pharmaceutical Sciences, Toho University, Funabashi, Chiba 274-8501, Japan.*

<sup>g</sup> *Division of Oxidative Stress Research, Showa Pharmaceutical University, Machida, Tokyo 194-8543, Japan.*

<sup>h</sup> *Department of Bioinspired Science, Ewha Womans University, Seoul, 120-750, Korea.*

<sup>i</sup> *Faculty of Science and Technology, Meijo University, Shiogamaguchi, Tempaku, Nagoya, Aichi 468-8502, Japan*

E-mail: nakanis@nirs.go.jp, fukuzumi@chem.eng.osaka-u.ac.jp

## Experimental details

### Materials

Commercially available reagents, such as 2,2-diphenyl-1-picrylhydrazyl radical (DPPH<sup>•</sup>), 2,2-di(4-*tert*-octylphenyl)-1-picrylhydrazyl radical (DOPPH<sup>•</sup>),  $\beta$ -cyclodextrin ( $\beta$ -CD), ascorbic acid (AscH<sub>2</sub>), Trolox, buffer salts and organic solvents, were the best available purity and used without further purification unless otherwise noted. Water used in this study was freshly prepared with a Milli-Q system (Millipore Direct-Q UV 3). The solubilisation of DPPH<sup>•</sup> to water using  $\beta$ -CD was carried out by the procedure described in the text.

### Spectral and kinetic measurements

UV-vis spectra were recorded on an Agilent 8453 photodiode array spectrophotometer. The rates of the scavenging reaction of the  $\beta$ -CD-solubilised DPPH<sup>•</sup> (DPPH<sup>•</sup>/ $\beta$ -CD) in a phosphate buffer (0.1 M, pH 7.4) by water soluble antioxidants (AscH<sub>2</sub> and Trolox) were determined by monitoring the absorbance change at 527 nm due to DPPH<sup>•</sup>/ $\beta$ -CD ( $\epsilon = 1.1 \times 10^4 \text{ M}^{-1} \text{ cm}^{-1}$ ) using a stopped-flow technique on a UNISOKU RSP-1000-02NM spectrophotometer. The pseudo-first-order rate constants ( $k_{\text{obs}}$ ) were determined by a least-squares curve fit using an Apple MacBook Pro personal computer. The first-order plots of  $\ln(A - A_{\infty})$  vs. time ( $A$  and  $A_{\infty}$  are denoted as the absorbance at the reaction time and the final absorbance, respectively) were linear until three or more half-lives with the correlation coefficient  $\rho > 0.999$ .

### Theoretical calculations

Density functional theory (DFT) calculations of  $\beta$ -CD, DPPH<sup>•</sup>, DOPPH<sup>•</sup>, and their inclusion complexes (DPPH<sup>•</sup>/ $\beta$ -CD and DOPPH<sup>•</sup>/ $\beta$ -CD) were performed with Gaussian 09 (Revision A.02, Gaussian, Inc.).<sup>S1</sup> The calculations were performed on a 32-processor QuantumCube<sup>TM</sup> at the UB3LYP/3-21G level of theory for DPPH<sup>•</sup>, DOPPH<sup>•</sup> and their complexes and the RB3LYP/3-21G for  $\beta$ -CD.<sup>S2</sup> The polarizable continuum model (C-PCM), parameterized for water as a solvent, was applied during the geometry optimisation step. Graphical outputs of the computational results were generated with the *GaussView* software program (ver. 3.09) developed by Semichem, Inc.<sup>S3</sup>

### EPR measurements

EPR spectra of DPPH<sup>•</sup> and the inclusion complex (DPPH<sup>•</sup>/ $\beta$ -CD) were recorded on a JEOL X-band spectrometer (JES-RE1XE) with an attached variable temperature apparatus. The EPR spectra were measured at 77 (Fig. S1) and 298 K (Fig. 4). The magnitude of modulation was chosen to optimise the resolution and the signal-to-noise (S/N) ratio of the observed spectra under non-saturating microwave conditions. The  $g$  values and the hyperfine coupling constants were calibrated with a Mn<sup>2+</sup> marker.

### References

- S1 M. J. Frisch, G. W. Trucks, H. B. Schlegel, G. E. Scuseria, M. A. Robb, J. R. Cheeseman, G. Scalmani, V. Barone, B. Mennucci, G. A. Petersson, H. Nakatsuji, M. Caricato, X. Li, H. P. Hratchian, A. F. Izmaylov, J. Bloino, G. Zheng, J. L. Sonnenberg, M. Hada, M. Ehara, K. Toyota, R. Fukuda, J. Hasegawa, M. Ishida, T. Nakajima, Y. Honda, O. Kitao, H. Nakai, T. Vreven, J. A. Montgomery, Jr., J. E. Peralta, F. Ogliaro, M. Bearpark, J. J. Heyd, E. Brothers, K. N. Kudin, V. N. Staroverov, R. Kobayashi, J. Normand, K. Raghavachari, A. Rendell, J. C. Burant, S. S. Iyengar, J. Tomasi, M. Cossi, N. Rega, J. M. Millam, M. Klene, J. E. Knox, J. B. Cross, V. Bakken, C. Adamo, J. Jaramillo, R. Gomperts, R. E. Stratmann, O. Yazyev, A. J. Austin, R. Cammi, C. Pomelli, J. W. Ochterski, R. L. Martin, K. Morokuma, V. G. Zakrzewski, G. A. Voth, P. Salvador, J. J. Dannenberg, S. Dapprich, A. D. Daniels, O. Farkas, J. B. Foresman, J. V. Ortiz, J. Cioslowski and D. J. Fox, Gaussian, Inc., Wallingford CT, 2009.
- S2 (a) A. D. Becke, *J. Chem. Phys.*, 1993, **98**, 5648; (b) C. Lee, W. Yang and R. G. Parr, *Phys. Rev. B*, 1988, **37**, 785; (c) P. J. Hay and W. R. Wadt, *J. Chem. Phys.*, 1985, **82**, 270.
- S3 R. Dennington, II, T. Keith, J. Millam, K. Eppinnett, W. L. Hovell and R. Gilliland, GaussView, Semichem, Shawnee Mission, KS, 2003.

(a) DPPH<sup>•</sup>/β-CD in H<sub>2</sub>O

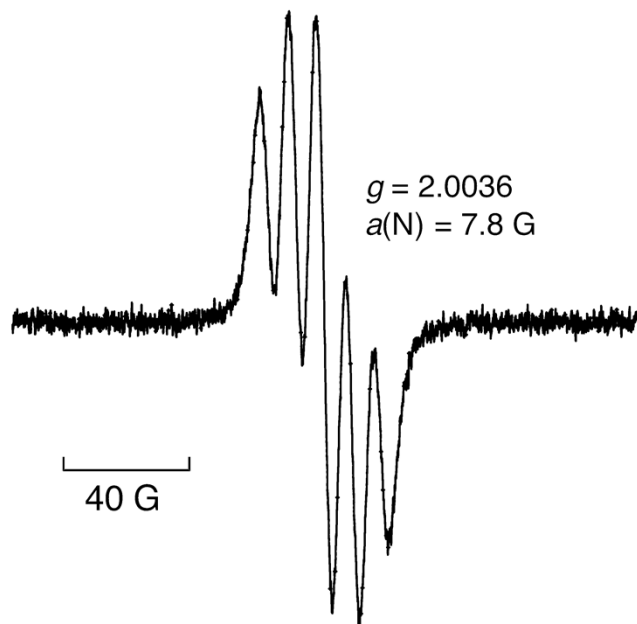

(b) DPPH<sup>•</sup> in MeOH

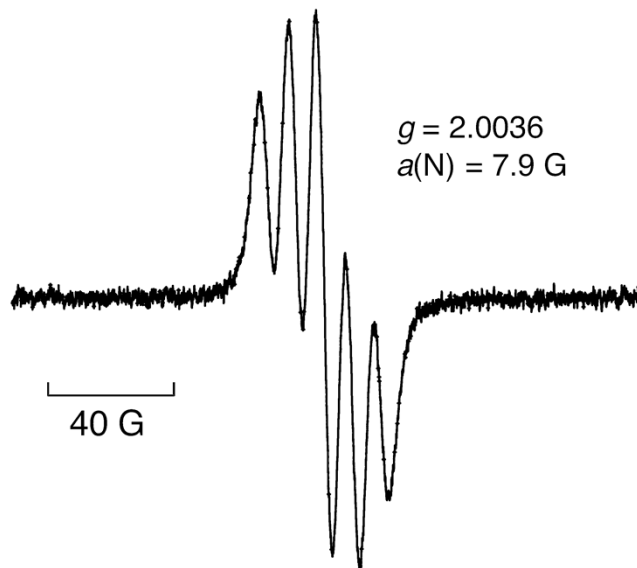

**Fig. S1** EPR spectra of (a) DPPH<sup>•</sup>/β-CD ( $1.0 \times 10^{-5} \text{ M}$ ) in distilled water at room temperature and (b) DPPH<sup>•</sup> ( $1.0 \times 10^{-5} \text{ M}$ ) in MeOH at room temperature.
